# Supplementary material
Source: PubMed Central journal article supplement (PMC2861798)
Supplement: NIHMS190958-supplement-1_si_001.pdf [file NIHMS190958-supplement-1_si_001.pdf]

# **In-Situ Roughening of Polymeric Microstructures**

Hamed Shadpour<sup>a</sup> and Nancy L. Allbritton<sup>a,b,\*</sup>

*<sup>a</sup>Department of Chemistry, University of North Carolina, Chapel Hill,  
North Carolina 27599, USA*

*<sup>b</sup>Department of Biomedical Engineering, University of North Carolina, Chapel Hill, North  
Carolina 27599, USA, and North Carolina State University, Raleigh,  
North Carolina 27695, USA*

## **Supporting Information**

\*Corresponding author

E-mail: nlallbri@unc.edu. Fax: 919-962-2388, Phone: 919-966-2291

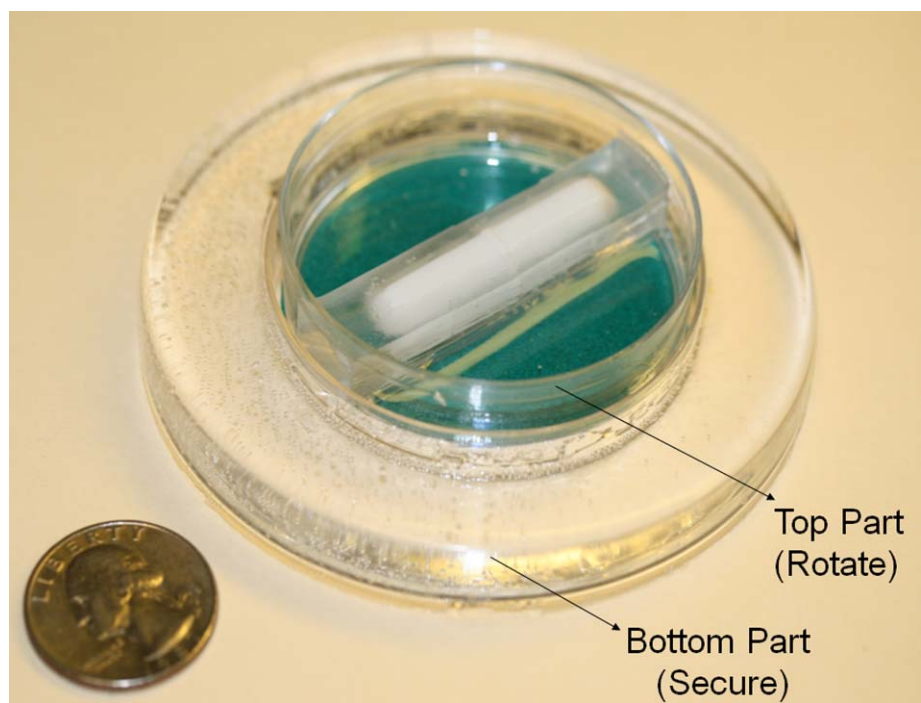

**Figure S1.** Photograph of the assembled device used for roughening of micropallet arrays, PDMS stamps, and photoresist films.

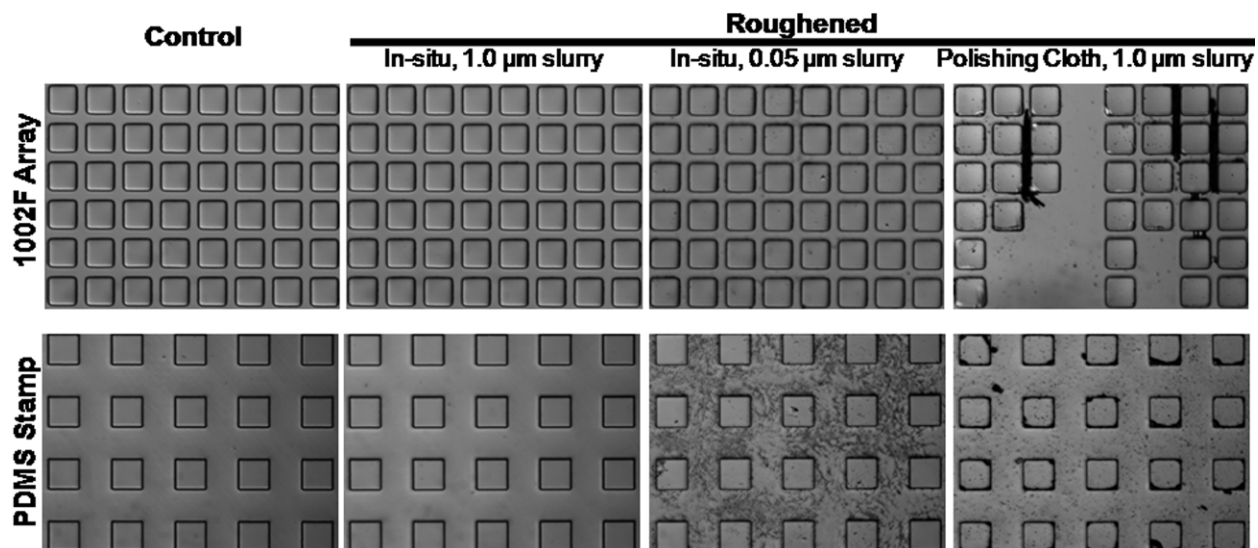

**Figure S2.** Arrays roughened with different media. DIC micrographs (40 $\times$ ) of 1002F pallet arrays (45  $\mu\text{m}$  sides, 15  $\mu\text{m}$  inter-pallet spacing, 50  $\mu\text{m}$  height) and PDMS stamps (50  $\mu\text{m}$  squares, 50  $\mu\text{m}$  spacing, 50  $\mu\text{m}$  height) roughened with 1.0-micron particles, 0.05-micron particles or 1.0-micron particles overlaid with a polishing cloth. Use of the 0.05-micron particle or polishing cloth either damaged the array or left visible residue on the arrays. The roughening procedure for experiments involved with a polishing cloth only (last column in this figure) was similar to in-situ roughening procedure except that a polishing cloth attached to a flat surface was used by hand to mechanically roughen the arrays and stamps with slurry. Similar to in-situ method, the roughened arrays and stamps were rinsed with distilled water and then ethanol five times and dried with  $\text{N}_2$ .

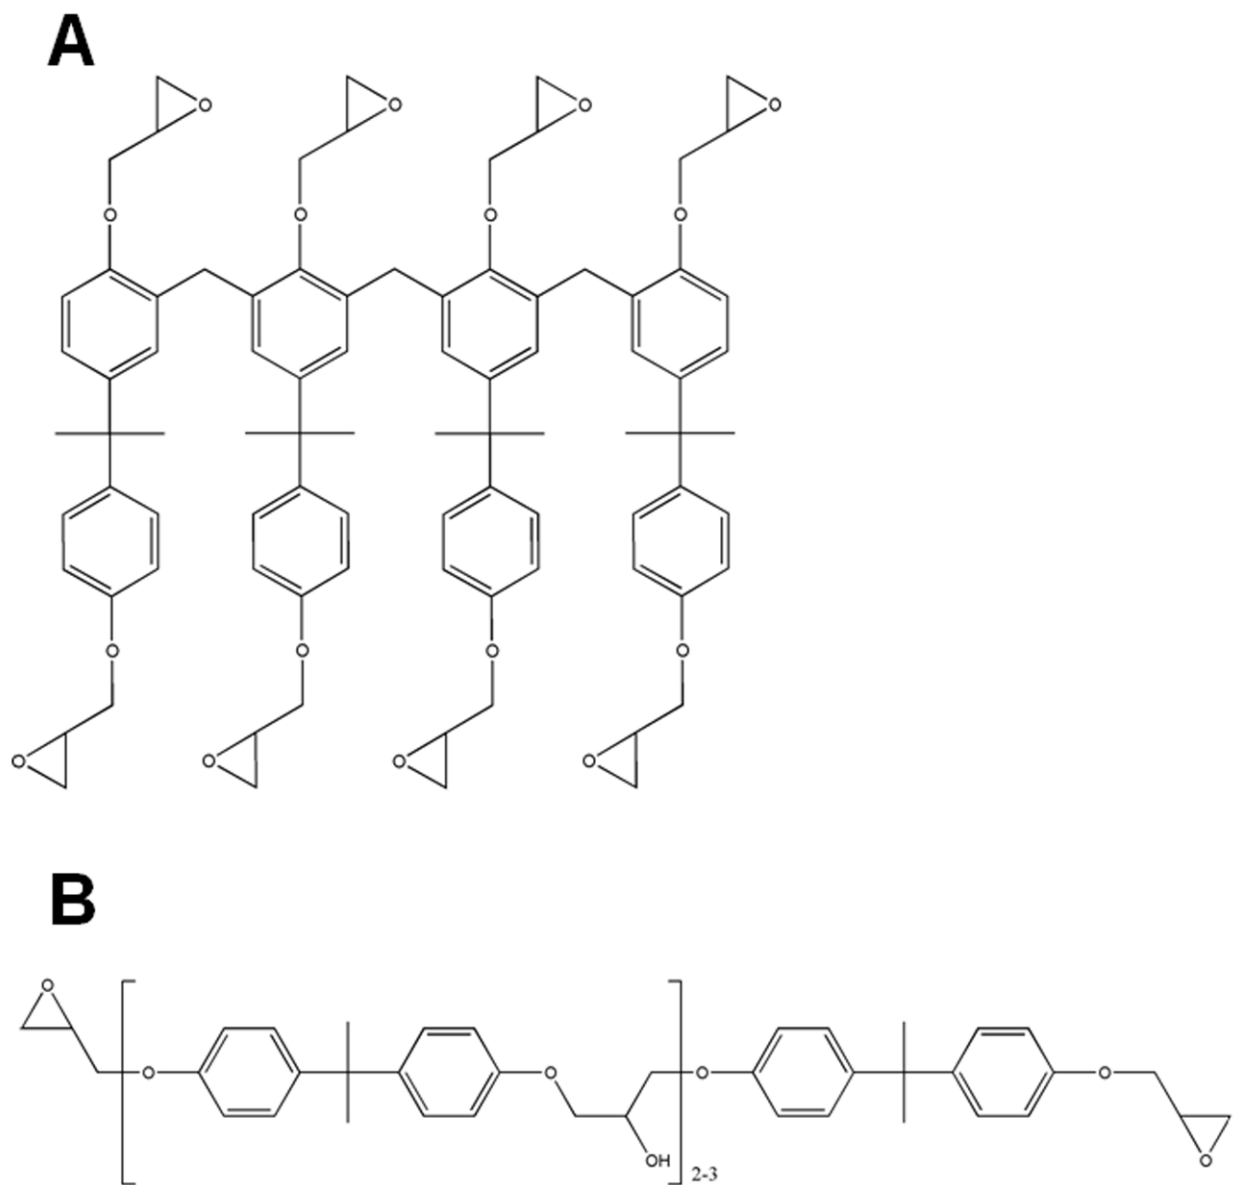

**Figure S3.** Chemical structure of (A) SU8 and (B) 1002F resins.

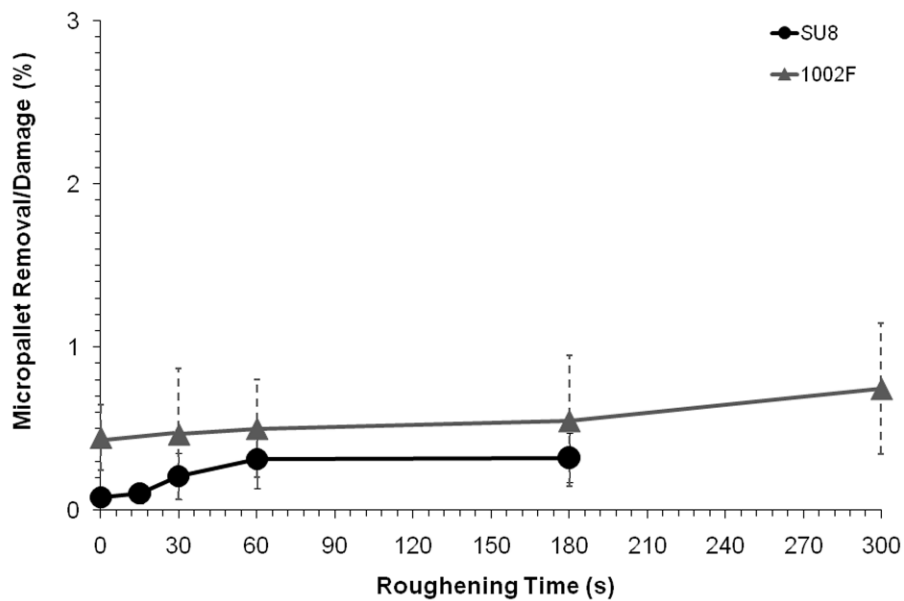

**Figure S4.** Micropallet removal or damage plotted against the roughening time for SU8 and 1002F micropallet arrays. The data points represent the average values ( $n > 5,000$  micropallets) and the error bars correspond to standard deviations.

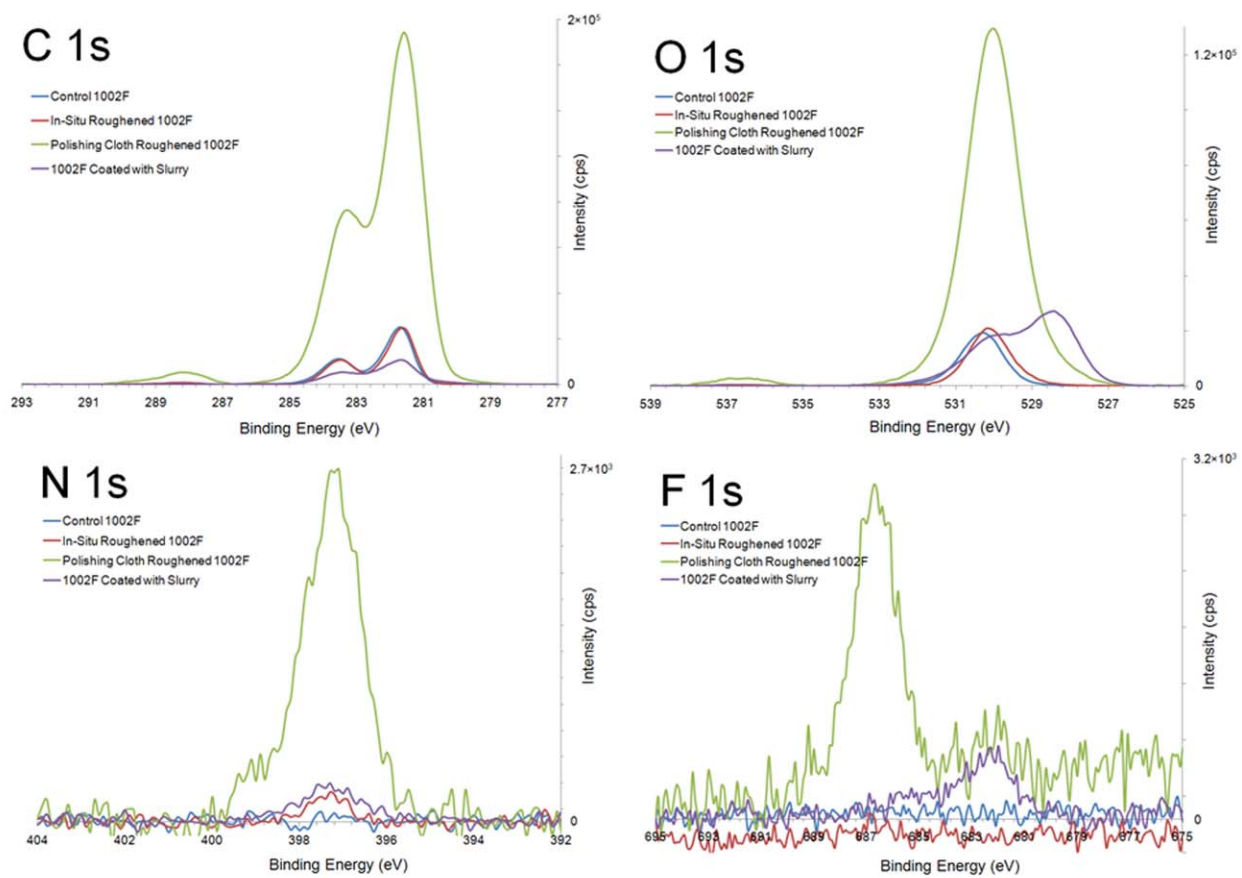

**Figure S5.** High resolution XPS scans for 1002F surfaces before and after roughening.

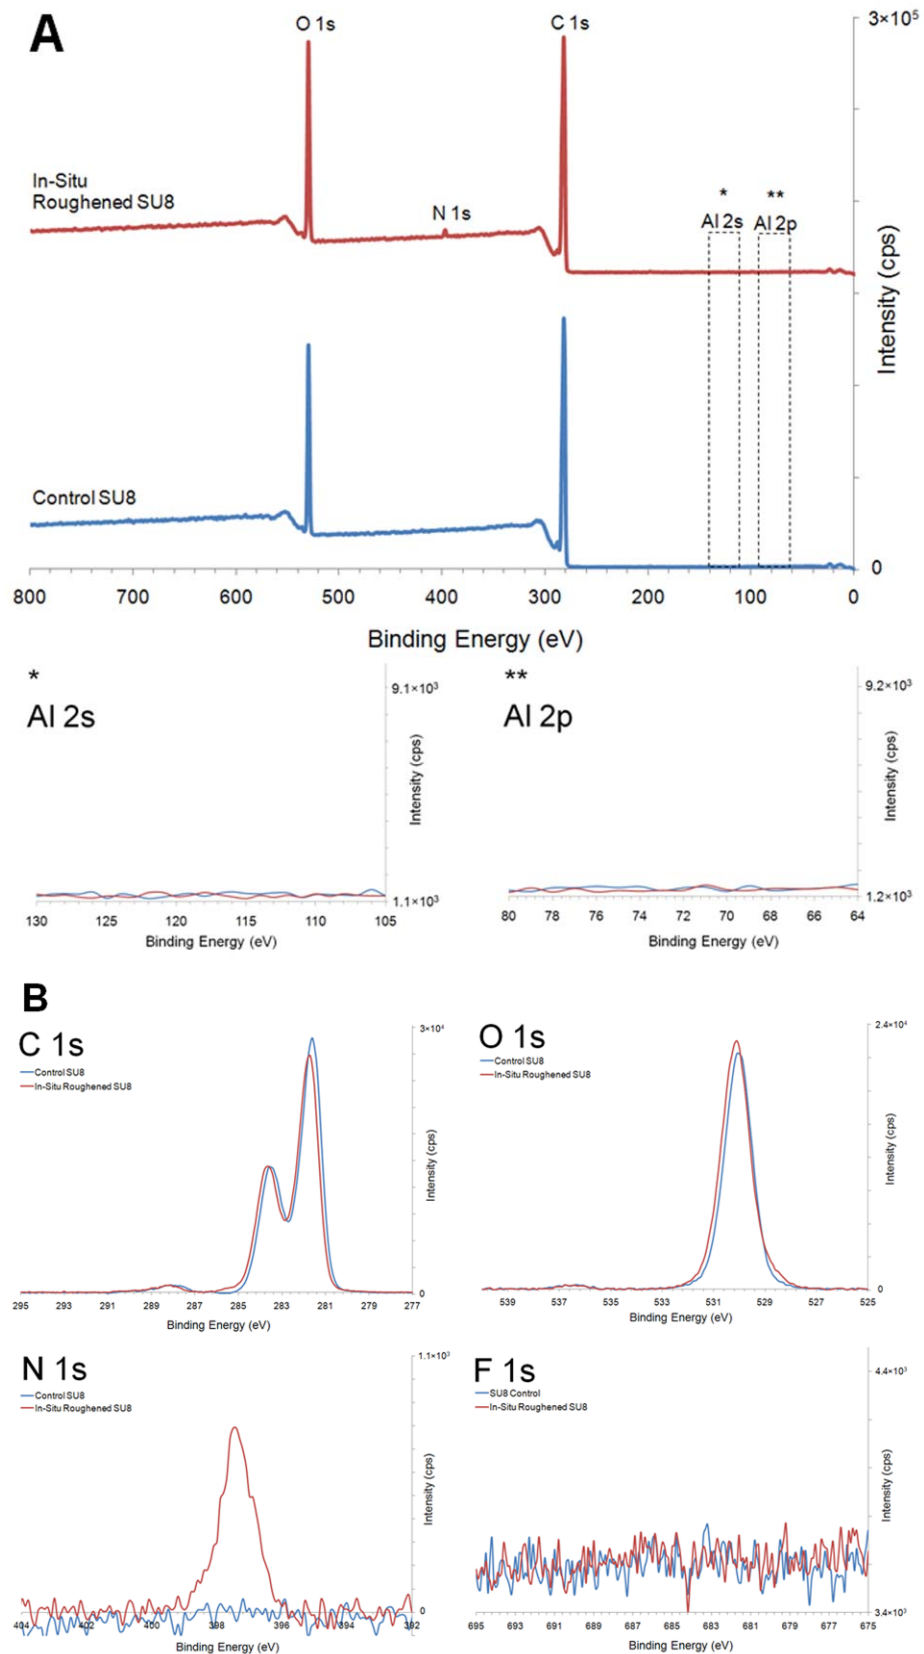

**Figure S6.** XPS spectra (A) of SU8 surfaces with corresponding high resolution scans (B).

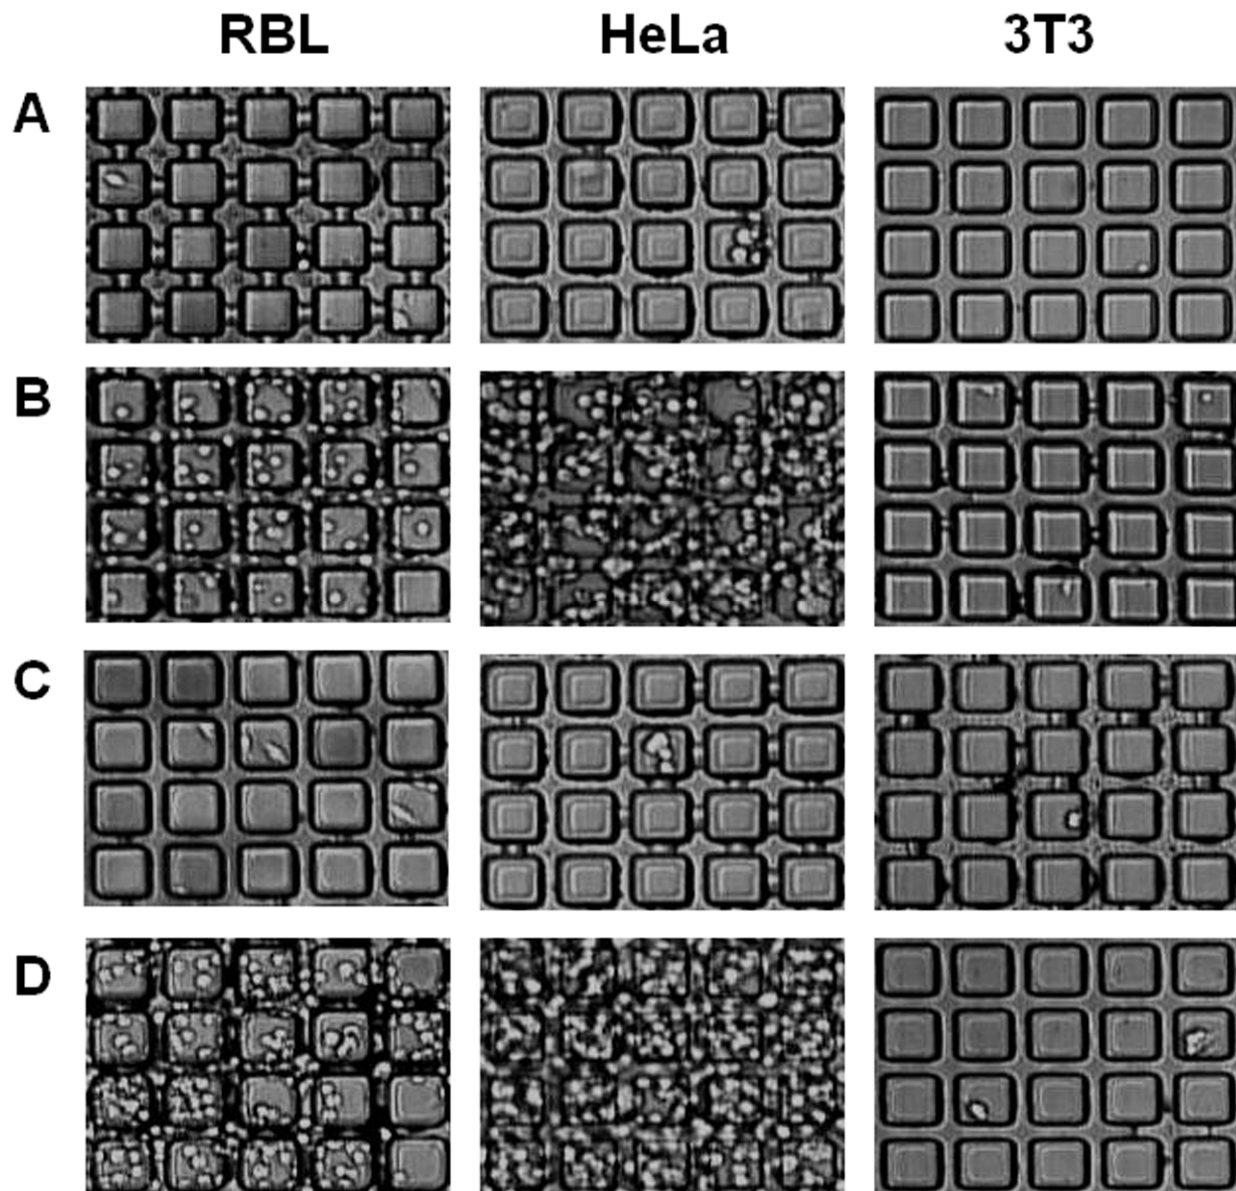

**Figure S7.** Typical micrographs illustrating cell attachment/growth on (A) SU8, (B) roughened SU8, (C) 1002F, and (D) roughened 1002F micropallet arrays for RBL, HeLa, and 3T3 cells. Shown are cells after 16 h of culture on the micropallet arrays.



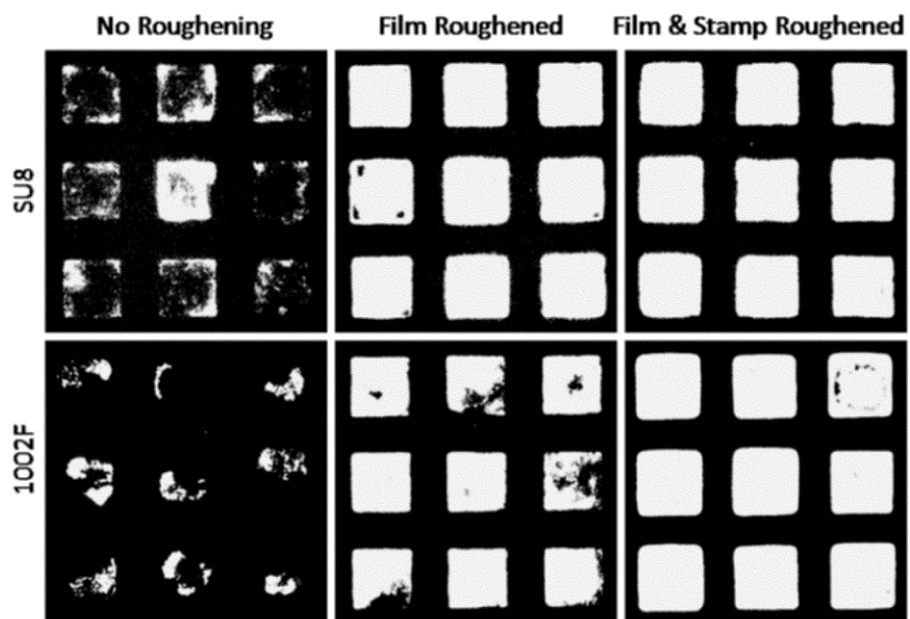

**Figure S8.** Fluorescence micrographs of BSA-Alexa 647 printed on SU8 and 1002F surfaces before and after roughening of the substrate or stamp. Each square is 100  $\mu\text{m}$  on a side.
